# Supplementary material
Source: HighWire-hosted journal article supplement (https://bmjopen.bmj.com/content/15/4/e094040)
Supplement: inline-supplementary-material-3 [file inline-supplementary-material-3.pdf]

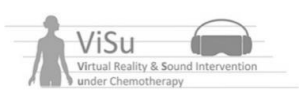

Screening Form

Patient-ID:  
(only after inclusion)

Date of Screening:

.

.

2

0

2

Inclusion Criteria

|                                                                                                                     |                                                                          |
|---------------------------------------------------------------------------------------------------------------------|--------------------------------------------------------------------------|
| Age of patient:                                                                                                     | <input type="checkbox"/> ≥18 years<br><input type="checkbox"/> <18 years |
| Does the patient have sufficient language skills to participate?                                                    | <input type="checkbox"/> yes <input type="checkbox"/> no                 |
| Is there a confirmed diagnosis of cancer?                                                                           | <input type="checkbox"/> yes <input type="checkbox"/> no                 |
| Is the patient receiving intravenous chemotherapy (duration of application including flushing at least 60 minutes)? | <input type="checkbox"/> yes <input type="checkbox"/> no                 |
| Will the first survey take place at least at the second chemotherapy session?                                       | <input type="checkbox"/> yes <input type="checkbox"/> no                 |
| At least five chemotherapy sessions outstanding?                                                                    | <input type="checkbox"/> yes <input type="checkbox"/> no                 |
| GAD-7 ≥ 5?                                                                                                          | <input type="checkbox"/> yes <input type="checkbox"/> no                 |

Exclusion Criteria

|                                                                  |                                                          |
|------------------------------------------------------------------|----------------------------------------------------------|
| Are there any serious visual and/or hearing impairments?         | <input type="checkbox"/> yes <input type="checkbox"/> no |
| Are there any relevant pre-existing conditions? <sup>1</sup>     | <input type="checkbox"/> yes <input type="checkbox"/> no |
| Were there any serious side effects from the first chemotherapy? | <input type="checkbox"/> yes <input type="checkbox"/> no |
| Is the chemotherapy being carried out as part of another study?  | <input type="checkbox"/> yes <input type="checkbox"/> no |
| Are there any brain metastases?                                  | <input type="checkbox"/> yes <input type="checkbox"/> no |

Inclusion

|                                                       |                                                          |
|-------------------------------------------------------|----------------------------------------------------------|
| Education has taken place                             | <input type="checkbox"/> yes <input type="checkbox"/> no |
| Inclusion and exclusion criteria enable participation | <input type="checkbox"/> yes <input type="checkbox"/> no |

Does the patient consent to participate in the study?☐ yes ☐ no

In case of “Yes”, the declaration of consent will be signed. In case of “No”, the second page will be filled in.

<sup>1</sup> Neurological/psychiatric pre-existing conditions that affect the vestibular system, impair the sense of balance or alter visual perception, epilepsy or claustrophobia.

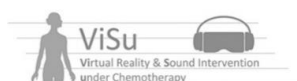

## Screening Form

Please check all that apply:

*Multiple responses possible*

- ☐ Own current state of health (physical, mental) speaks against participation.
- ☐ Focus should be on chemotherapy, participation is perceived as disruptive.
- ☐ Concern about too much additional effort during therapy.
- ☐ Concern about possible side effects.
- ☐ Concern about data protection.
- ☐ Concern about the collection of saliva samples.
- ☐ No need, as chemotherapy is not perceived as unpleasant or stressful.
- ☐ No need, as own strategies for distraction and bridging time are used (reading, smartphone/tablet, accompanying person, fellow patients, sleeping,...)
- ☐ No interest in participating in clinical trials in general.
- ☐ No interest in the question or in the VR technology.
- ☐ No interest in or skepticism about the effectiveness of the interventions.
- ☐ No interest in psycho-oncological support services.

If none of the points above apply or if further comments should be made, the free text field below may be used:

- ☐ No further indications of reasons.

**Many thanks!**

- 
- ☐ Patient did not want to provide feedback. *(Only to be filled in by the research team)*
